# Supplementary material
Source: HighWire-hosted journal article supplement (https://www.life-science-alliance.org/content/5/7/e202101334/F7)

Raw images of immunoblots:

1C

LUSC

LUAD

GFPT1

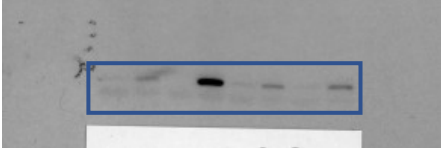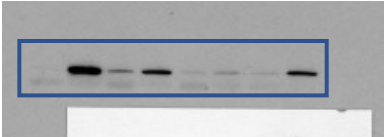

Actin

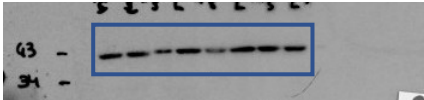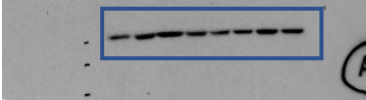

2B

GFAT1

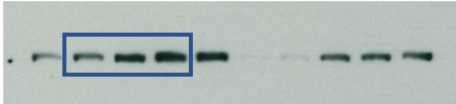

Actin

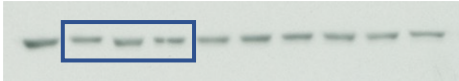

3A

RL2

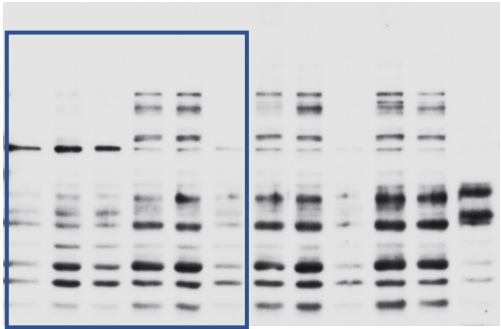

CTD110.6

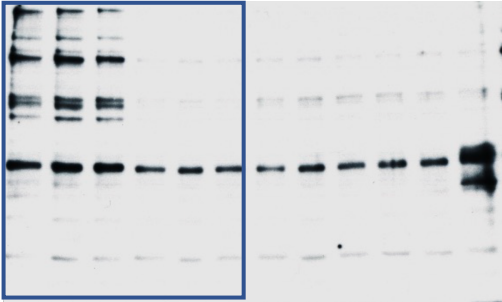

Tubulin

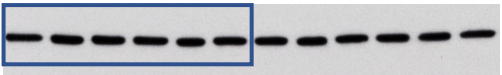

**3C**

CTD110.6

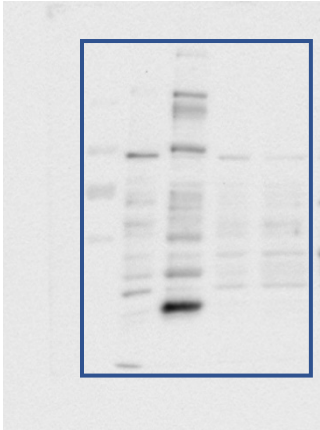

Tubulin

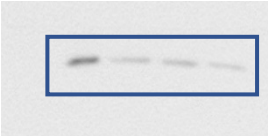

4B

CTD110.6

RL2

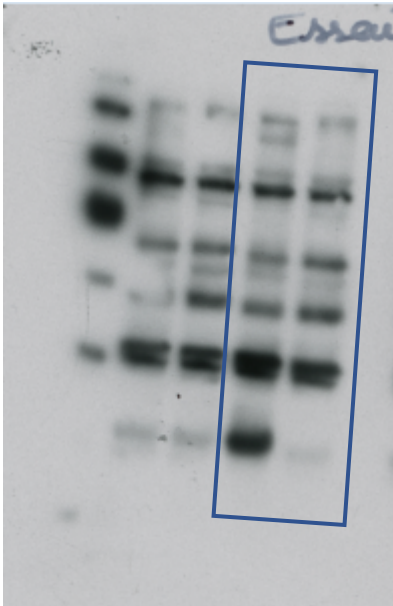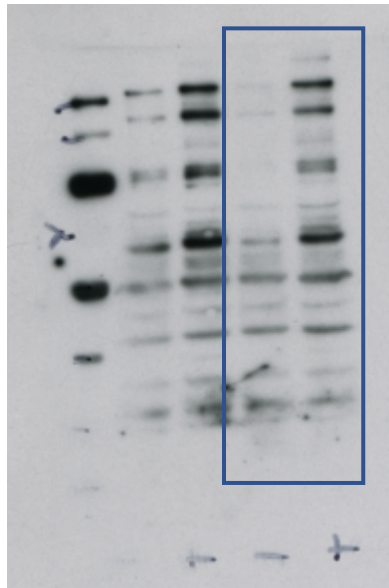

Tubulin

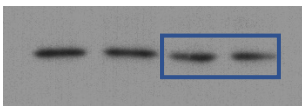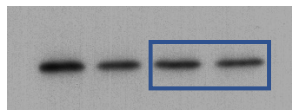

4C

Luciferase

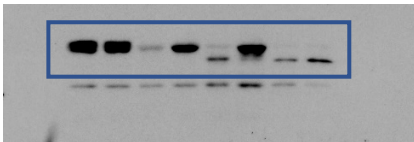

Tubulin

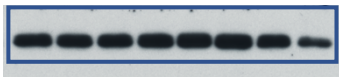

4D

Luciferase

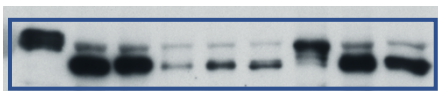

Tubulin

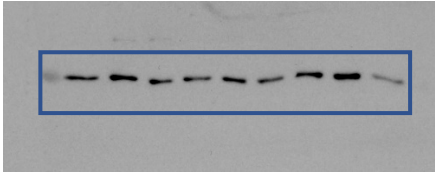

5C

EGFR

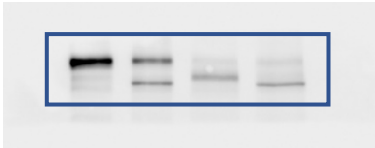

Tubulin

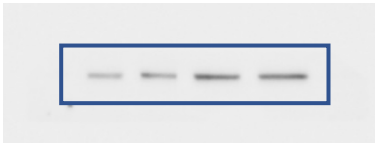

6A

EGFR

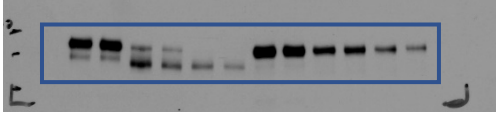

pEGFR

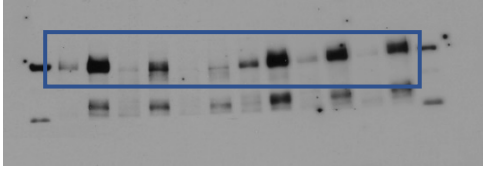

pGab1

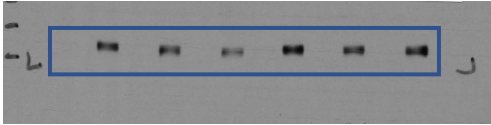

pShc

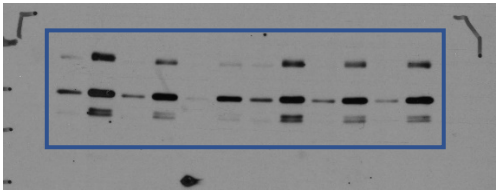

pPlcg

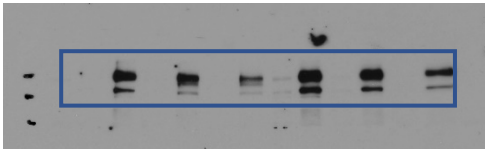

Tubulin

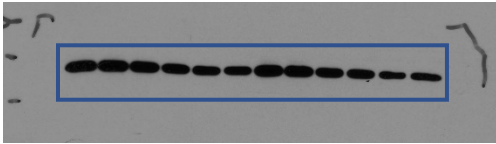

**6D**

EGFR

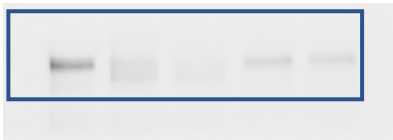

pEGFR

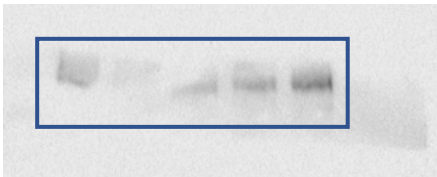

pSHC

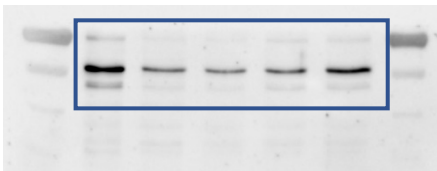

Tubulin

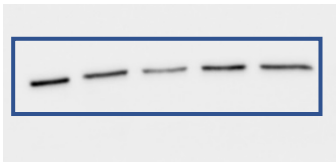

**8B**

Sec24D

LUSC

LUAD

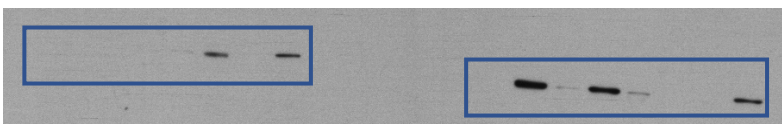

**8D**

Sec24D

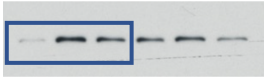

Tubulin

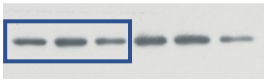

**8E**

Sec24D

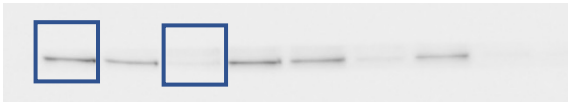

Tubulin

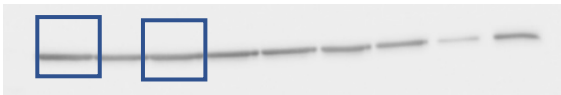

**S2**

LUSC

LUAD

RL2

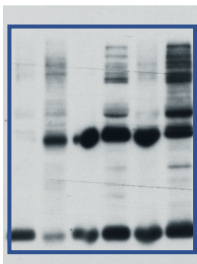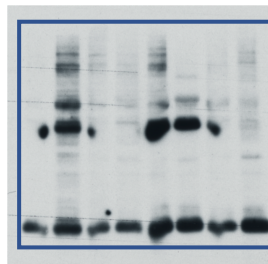

OGT

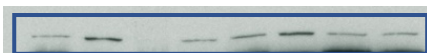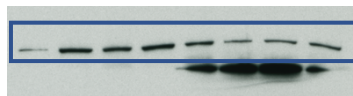

CTD110.6

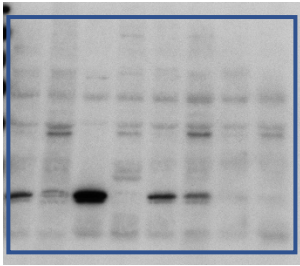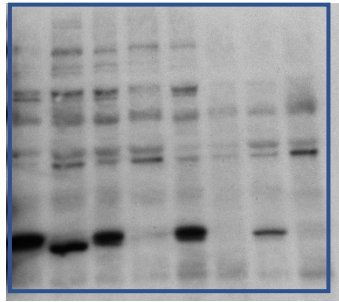

Actin

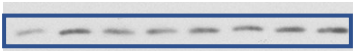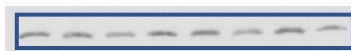

**S3**

EGFR

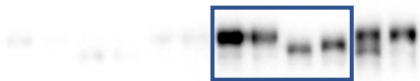

Actin

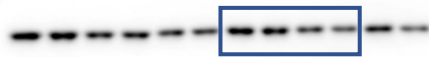

**S4A**

EGFR

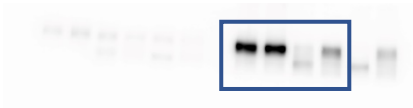

PDL1

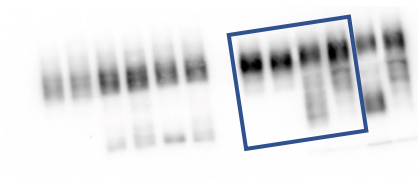

Actin

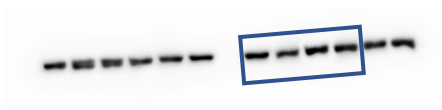

**S4B**

EGFR

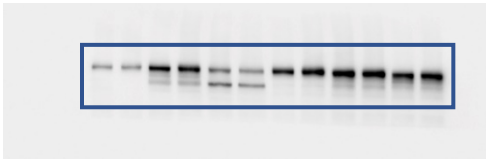

pEGFR

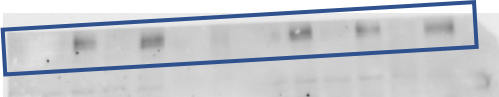

pGab1

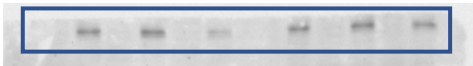

pSHC

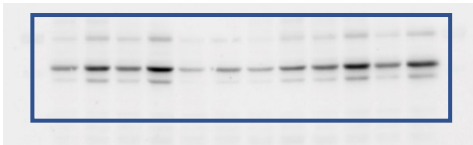

Tubulin

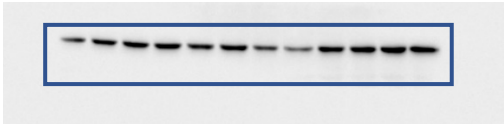

**S4C – GM53**

EGFR

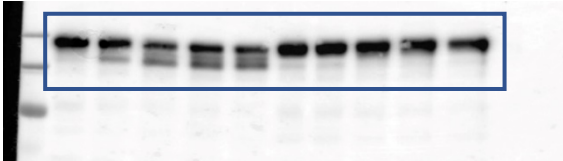

pEGFR

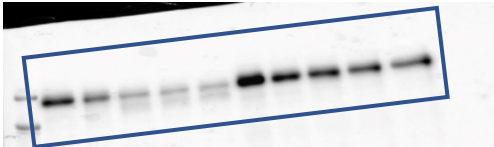

pGab1



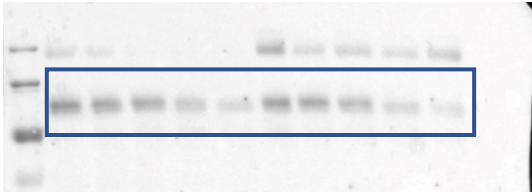

pErk1/2

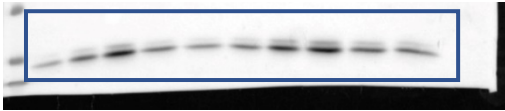

Tubulin

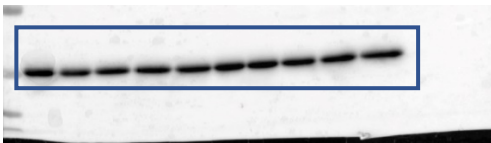

### S4C-PC9

EGFR

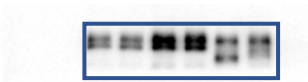

pEGFR

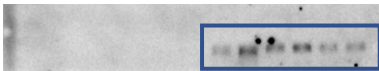

pGab1

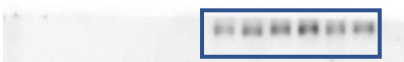

pErk1/2

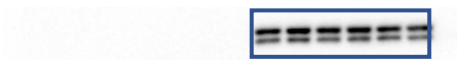

Actin

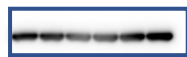

### S5C

Sec24D

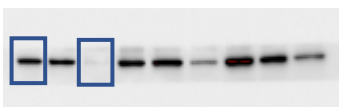

Tubulin

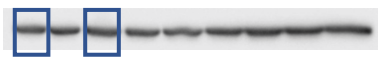

S6

NAGK

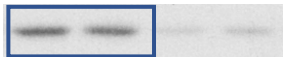

Tubulin

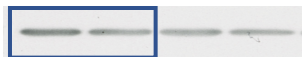

Supplement: inline-supplementary-material-7 [file inline-supplementary-material-7.pdf]
